# Supplementary material
Source: Springer Nature journal article supplement (https://www.springermedizin.de/resource/supplementary/12885_2010_2775_MOESM6_ESM.pdf/9461952)

**MDA-435****MDA-231****MCF7****Hek-293****GM1500****uPAR**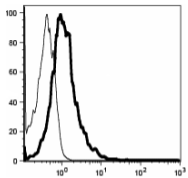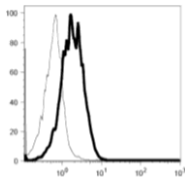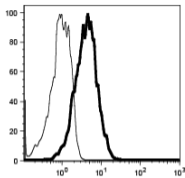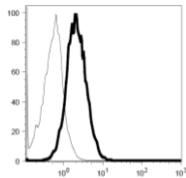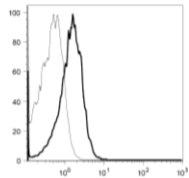**VEGFR**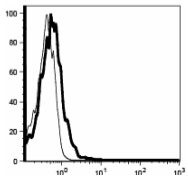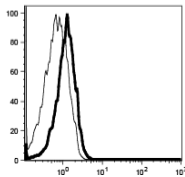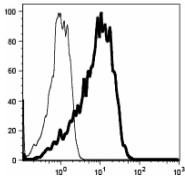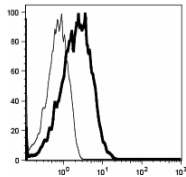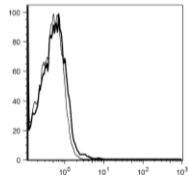

Supplement: MOESM6 [file 9461952]
